# Supplementary material for: Synthesis of New Biscoumarin Derivatives, In Vitro Cholinesterase Inhibition, Molecular Modelling and Antiproliferative Effect in A549 Human Lung Carcinoma Cells
Source: MDPI journal article supplement (doi:10.3390/ijms22083830), 2021-04-07

**Figure S1** Effects of derivatives **12b** (a) and **12c** (b) on A549 cell metabolic activity evaluated by MTT assay. The cells were treated with the indicated concentration of the compounds for 24 and 48 h. Statistical significance \*  $p < 0.05$ ; \*\*  $p < 0.01$ ; \*\*\*  $p < 0.001$  for each experimental group compared to the untreated cells.

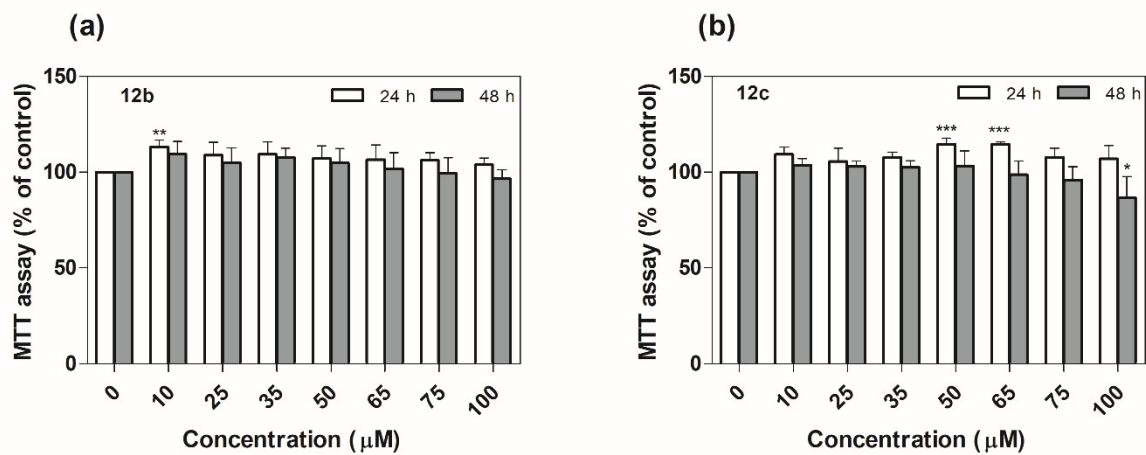

Supplement: s1 [file s1]
